# Supplementary material for: Aggregating Behavior of Phenolic Compounds — A Source of False Bioassay Results?
Source: Molecules. 2012 Sep 7;17(9):10774–90. doi: 10.3390/molecules170910774 (PMC6268869; doi:10.3390/molecules170910774)
Supplement: Supplementary file 1 [file molecules-17-10774-s001.pdf]

## Supplementary Information

### Aggregating behavior of Phenolic Compounds: A Source of False Bioassay Results?

**Table S1.** List of the phenolic compounds used in the study and their bioactivity summary data in PubChem BioAssays database. (PubChem search).

| Chemical name                    | MW    | Supplier                | active | total | ratio<br>(active/total) |
|----------------------------------|-------|-------------------------|--------|-------|-------------------------|
| Acacetin                         | 284.3 | Carl Roth GmbH, Germany | 41     | 520   | <b>0.079</b>            |
| Alphanaphthoflavone              | 272.9 | Acros, USA              | 31     | 135   | <b>0.230</b>            |
| Apigenin                         | 270.2 | Fluka, Switzerland      | 146    | 1062  | <b>0.137</b>            |
| L-ascorbic acid                  | 176.1 | Sigma, Germany          | 67     | 780   | <b>0.086</b>            |
| Benzoic acid                     | 122.1 | Merck, Germany          | 24     | 429   | <b>0.056</b>            |
| 3-Benzoylbenzo(F)coumarin        | 300.3 | Acros, USA              | N/A    | N/A   |                         |
| 3-(2-Benzoxazolyl)umbelliferone  | 279.2 | Fluka, Switzerland      | 8      | 73    | <b>0.110</b>            |
| Bergapten                        | 216.2 | Carl Roth GmbH, Germany | 21     | 590   | <b>0.036</b>            |
| Butylated hydroxyanisole         | 180.2 | Sigma, Germany          | N/A    | N/A   |                         |
| Caffeic acid                     | 180.2 | Sigma, USA              | 101    | 1101  | <b>0.092</b>            |
| (+)-Catechin                     | 290.3 | Sigma, USA              | 9      | 305   | <b>0.030</b>            |
| Catechol                         | 110.1 | Sigma, Germany          | 70     | 639   | <b>0.110</b>            |
| Chrysin                          | 254.3 | Extrasynthese, France   | 84     | 791   | <b>0.106</b>            |
| o-Coumaric acid                  | 164.2 | Sigma, USA              | 6      | 35    | <b>0.171</b>            |
| Coumarin 102                     | 255.3 | Acros, USA              | 0      | 2     | <b>0.000</b>            |
| Coumarin 30                      | 347.4 | ICN, USA                | 127    | 761   | <b>0.167</b>            |
| Coumarin 7                       | 333.4 | Acros, USA              | 158    | 796   | <b>0.198</b>            |
| Coumarin                         | 146.2 | Merck, Germany          | 38     | 916   | <b>0.041</b>            |
| Cyanidin chloride                | 322.7 | Carl Roth GmbH, Germany | 5      | 11    | <b>0.455</b>            |
| Daidzein                         | 254.3 | Extrasynthese, France   | 61     | 785   | <b>0.078</b>            |
| Daphnetin                        | 178.2 | Extrasynthese, France   | 27     | 240   | <b>0.113</b>            |
| 7-Diethylamino-3-thenoylcoumarin | 327.4 | Acros, USA              | 13     | 82    | <b>0.159</b>            |
| 2,3-Dihydroxybenzoic acid        | 154.1 | Fluka, Switzerland      | 5      | 327   | <b>0.015</b>            |
| 2,5-Dihydroxybenzoic acid        | 154.1 | Fluka, Switzerland      | 5      | 223   | <b>0.022</b>            |
| 2,6-Dihydroxybenzoic acid        | 154.1 | Fluka, Switzerland      | 2      | 14    | <b>0.143</b>            |
| 3,4-Dihydroxybenzoic acid        | 154.1 | Fluka, Switzerland      | 34     | 574   | <b>0.059</b>            |
| 3,5-Dihydroxybenzoic acid        | 154.1 | Fluka, Switzerland      | 10     | 15    | <b>0.667</b>            |
| 2,5-Dimethylphenol               | 122.2 | Fluka, Switzerland      | 1      | 141   | <b>0.007</b>            |
| Ellagic acid                     | 302.2 | Sigma, USA              | 171    | 865   | <b>0.198</b>            |
| (-)-Epicatechin                  | 290.3 | Sigma, USA              | 44     | 658   | <b>0.067</b>            |
| (-)-Epicatechin gallate          | 442.4 | Extrasynthese, France   | 42     | 117   | <b>0.359</b>            |
| (-)-Epigallocatechin             | 306.3 | Extrasynthese, France   | 18     | 158   | <b>0.114</b>            |
| (-)-Epigallocatechin gallate     | 458.4 | Extrasynthese, France   | 160    | 576   | <b>0.278</b>            |
| Ethoxyquin                       | 217.3 | Sigma, USA              | 22     | 543   | <b>0.041</b>            |
| Ferulic acid                     | 194.2 | Extrasynthese, France   | 30     | 501   | <b>0.060</b>            |

Table S1. Cont.

| Chemical name               | MW    | Supplier                | active | total | ratio<br>(active/total) |
|-----------------------------|-------|-------------------------|--------|-------|-------------------------|
| Flavone                     | 222.3 | Carl Roth GmbH, Germany | 46     | 596   | <b>0.077</b>            |
| Gallic acid                 | 170.1 | Sigma, USA              | 64     | 361   | <b>0.177</b>            |
| Genistein                   | 270.2 | Extrasynthese, France   | 214    | 1258  | <b>0.170</b>            |
| Gitoxigenin                 | 390.5 | Carl Roth GmbH, Germany | 22     | 81    | <b>0.272</b>            |
| Gossypin                    | 648.5 | Extrasynthese, France   | 1      | 3     | <b>0.333</b>            |
| Hamamelitannin              | 484.4 | Extrasynthese, France   | 2      | 13    | <b>0.154</b>            |
| Hesperidin                  | 610.6 | Extrasynthese, France   | 8      | 442   | <b>0.018</b>            |
| 2-Hydroxyacetophenone       | 136.2 | Fluka, Switzerland      | 0      | 8     | <b>0.000</b>            |
| 3-Hydroxyacetophenone       | 136.2 | Fluka, Switzerland      | 1      | 10    | <b>0.100</b>            |
| 4-Hydroxyacetophenone       | 136.2 | Fluka, Switzerland      | 3      | 19    | <b>0.158</b>            |
| 2-Hydroxyphenylacetic acid  | 152.2 | Fluka, Switzerland      | 1      | 8     | <b>0.125</b>            |
| 3-hydroxyphenylacetic acid  | 152.2 | Fluka, Switzerland      | 1      | 9     | <b>0.111</b>            |
| 4-Hydroxyphenylacetic acid  | 152.2 | Fluka, Switzerland      | 14     | 328   | <b>0.043</b>            |
| Hydroquinone                | 110.1 | Fluka, Switzerland      | 96     | 531   | <b>0.181</b>            |
| Isopropyl gallate           | 212.2 | Lancaster, UK           | 2      | 11    | <b>0.182</b>            |
| 2,4-Dihydroxybenzoic acid   | 154.1 | Fluka, Switzerland      | 9      | 435   | <b>0.021</b>            |
| Isorhamnetin                | 316.3 | Extrasynthese, France   | 15     | 80    | <b>0.188</b>            |
| Kaempferol                  | 286.3 | Extrasynthese, France   | 106    | 789   | <b>0.134</b>            |
| Khellin                     | 260.2 | Carl Roth GmbH, Germany | 15     | 809   | <b>0.019</b>            |
| Lauryl gallate              | 338.5 | Fluka, Switzerland      | 9      | 73    | <b>0.123</b>            |
| Leucocyanidin               | 306.3 | Carl Roth GmbH, Germany | 0      | 7     | <b>0.000</b>            |
| Luteolin                    | 286.3 | Extrasynthese, France   | 164    | 842   | <b>0.195</b>            |
| Luteolin-7-glucoside        | 448.4 | Extrasynthese, France   | 33     | 333   | <b>0.099</b>            |
| Malvin chloride             | 691   | Extrasynthese, France   | 0      | 66    | <b>0.000</b>            |
| Methyl gallate              | 184.2 | Fluka, Switzerland      | 17     | 577   | <b>0.029</b>            |
| 2'-Methoxy-a-naphthoflavone | 302.3 | ICC, USA                | N/A    | N/A   |                         |
| Morin dihydrate             | 338.3 | Carl Roth GmbH, Germany | 74     | 706   | <b>0.105</b>            |
| Myricetin                   | 318.3 | Extrasynthese, France   | 171    | 782   | <b>0.219</b>            |
| Naringenin                  | 272.3 | Sigma, Germany          | 40     | 830   | <b>0.048</b>            |
| 4-Methyl pyrocatechol       | 124.1 | Merck, Germany          | 5      | 152   | <b>0.033</b>            |
| Nordihydroguaiaretic acid   | 302.4 | Fluka, Switzerland      | 139    | 742   | <b>0.187</b>            |
| Octyl gallate               | 282.3 | Fluka, Switzerland      | 10     | 77    | <b>0.130</b>            |
| Phthalic acid               | 166.1 | Merck, Germany          | 1      | 415   | <b>0.002</b>            |
| Procyanidin B1              | 578.5 | Extrasynthese, France   | 1      | 15    | <b>0.067</b>            |
| Procyanidin B2              | 578.5 | Extrasynthese, France   | 4      | 48    | <b>0.083</b>            |
| n-Propyl gallate            | 212.2 | Sigma, USA              | 11     | 164   | <b>0.067</b>            |
| Protocatechuic acid         | 154.1 | Carl Roth GmbH, Germany | 34     | 574   | <b>0.059</b>            |
| Pyrogallol                  | 126.1 | Riedel-de Haën, Germany | 42     | 315   | <b>0.133</b>            |
| Quercetagenin               | 318.2 | Carl Roth GmbH, Germany | 16     | 21    | <b>0.762</b>            |
| Quercetin                   | 338.3 | Merck, Germany          | 419    | 1290  | <b>0.325</b>            |

Table S1. Cont.

| Chemical name                        | MW     | Supplier                | active | total | ratio<br>(active/total) |
|--------------------------------------|--------|-------------------------|--------|-------|-------------------------|
| Quercetin-3,7,3',4'-tetramethylether | 358.4  | Extrasynthese, France   | 6      | 94    | <b>0.064</b>            |
| Quercitrin dihydrate                 | 484.4  | Carl Roth GmbH, Germany | 13     | 130   | <b>0.100</b>            |
| Rosmarinic acid                      | 360.3  | Extrasynthese, France   | 57     | 351   | <b>0.162</b>            |
| Rutin                                | 664.6  | Merck, Germany          | 41     | 506   | <b>0.081</b>            |
| D(−)-Salicin                         | 286.3  | Carl Roth GmbH, Germany | 6      | 497   | <b>0.012</b>            |
| Salicylic acid                       | 138.1  | AnalaR, UK              | 51     | 769   | <b>0.066</b>            |
| Silybin                              | 482.4  | Carl Roth GmbH, Germany | 15     | 548   | <b>0.027</b>            |
| Sinapic acid                         | 224.2  | Fluka, Switzerland      | 6      | 326   | <b>0.018</b>            |
| Sinigrin monohydrate                 | 415.5  | Carl Roth GmbH, Germany | 0      | 0     | <b>0.000</b>            |
| Syringic acid                        | 198.2  | Sigma, USA              | 14     | 45    | <b>0.311</b>            |
| Tannic acid                          | 1791.2 | Sigma, USA              | 30     | 127   | <b>0.236</b>            |
| (+)-Taxifolin                        | 304.3  | Extrasynthese, France   | 20     | 500   | <b>0.040</b>            |
| Thymol                               | 150.2  | Riedel-de Haën, Germany | 13     | 445   | <b>0.029</b>            |
| 3,4,5-Trimethoxybenzoic acid         | 212.2  | Sigma, USA              | 1      | 187   | <b>0.005</b>            |
| 6-Hydroxy-2,5,7,8-tetramethylchro-   |        |                         |        |       |                         |
| man-2-carboxylic acid                | 250.3  | Aldrich, Germany        | N/A    | N/A   |                         |
| Umbelliferone                        | 162.1  | Sigma, USA              | 22     | 417   | <b>0.053</b>            |
| Vanillic acid                        | 168.2  | Fluka, Switzerland      | 6      | 608   | <b>0.010</b>            |
| Vanillin                             | 152.2  | Merck, Germany          | 13     | 331   | <b>0.039</b>            |
| Butylated hydroxytoluene             | 220.4  | Sigma, Germany          | 37     | 861   | <b>0.043</b>            |
| 4-Methylumbelliferone                | 175.1  | Extrasynthese, France   | 18     | 590   | <b>0.031</b>            |
| Isoscapoletin                        | 192.2  | Extrasynthese, France   | 2      | 41    | <b>0.049</b>            |
| Fraxetin                             | 208.2  | Extrasynthese, France   | 15     | 276   | <b>0.054</b>            |
| Fraxidin                             | 222.2  | Extrasynthese, France   | 0      | 0     | <b>0.000</b>            |
| Daphnetin                            | 178.4  | Extrasynthese, France   | 27     | 240   | <b>0.113</b>            |
| Daphnetin-7-methylether              | 192.2  | Extrasynthese, France   | 0      | 0     | <b>0.000</b>            |
| Scopoletin                           | 192.2  | Sigma, USA              | 33     | 639   | <b>0.052</b>            |
| 6-Methylcoumarin                     | 160.7  | Extrasynthese, France   | 0      | 302   | <b>0.000</b>            |
| 4-Hydroxycoumarin                    | 162.1  | Extrasynthese, France   | 4      | 110   | <b>0.036</b>            |
| Warfarin                             | 308.3  | Sigma, USA              | 0      | 378   | <b>0.000</b>            |
| 6-Methoxy-4-methylcoumarin           | 190.2  | Extrasynthese, France   | 6      | 739   | <b>0.008</b>            |
| 7-Methoxy-4-methylcoumarin           | 190.2  | Extrasynthese, France   | 3      | 242   | <b>0.012</b>            |
| 5,7-Dihydroxy-4-methylcoumarin       | 193.2  | Extrasynthese, France   | 6      | 323   | <b>0.019</b>            |
| 6,7-Dihydroxy-4-methylcoumarin       | 193.2  | Extrasynthese, France   | 4      | 75    | <b>0.053</b>            |
| Herniarin                            | 176.2  | Extrasynthese, France   | 18     | 618   | <b>0.029</b>            |
| 6,8-Dibromocoumarin carboxylic       |        |                         |        |       |                         |
| acid                                 | 348    | Avocado, UK             | N/A    | N/A   |                         |
| Esculetin                            | 178.2  | Fluka, Switzerland      | 32     | 755   | <b>0.042</b>            |
| Esculin sesquihydrate                | 367.3  | Fluka, Switzerland      | 1      | 163   | <b>0.006</b>            |

**Table S1.** *Cont.*

| <b>Chemical name</b> | <b>MW</b> | <b>Supplier</b>       | <b>active</b> | <b>total</b> | <b>ratio<br/>(active/total)</b> |
|----------------------|-----------|-----------------------|---------------|--------------|---------------------------------|
| Citropten            | 206.2     | Extrasynthese, France | 3             | 368          | <b>0.008</b>                    |
| Xanthotoxin          | 216.3     | Extrasynthese, France | 117           | 1146         | <b>0.102</b>                    |
| Coumarin 106         | 281.4     | Acros, USA            | 2             | 2            | <b>1.000</b>                    |
| Coumarin 153         | 302.2     | Acros, USA            | 79            | 619          | <b>0.128</b>                    |

“Supplier” indicates the provider of the compound used in the current study. Bioactivity summary data were collected from PubChem database in July 2012. “N/A” indicates that the compound was not found in PubChem BioAssays database.
